# Supplementary material
Source: publisher figshare collection journal article supplement (https://future-science-group.figshare.com/ndownloader/files/34508228)
Supplement: Supplementary file 1 [file 34508228]

**Systematic literature review and network meta-analysis of pembrolizumab versus other interventions for previously untreated, unresectable or metastatic, microsatellite instability-high or mismatch repair deficient colorectal cancer**

**Supplementary Figure**

Figure S1: Process for selection of analytical approach


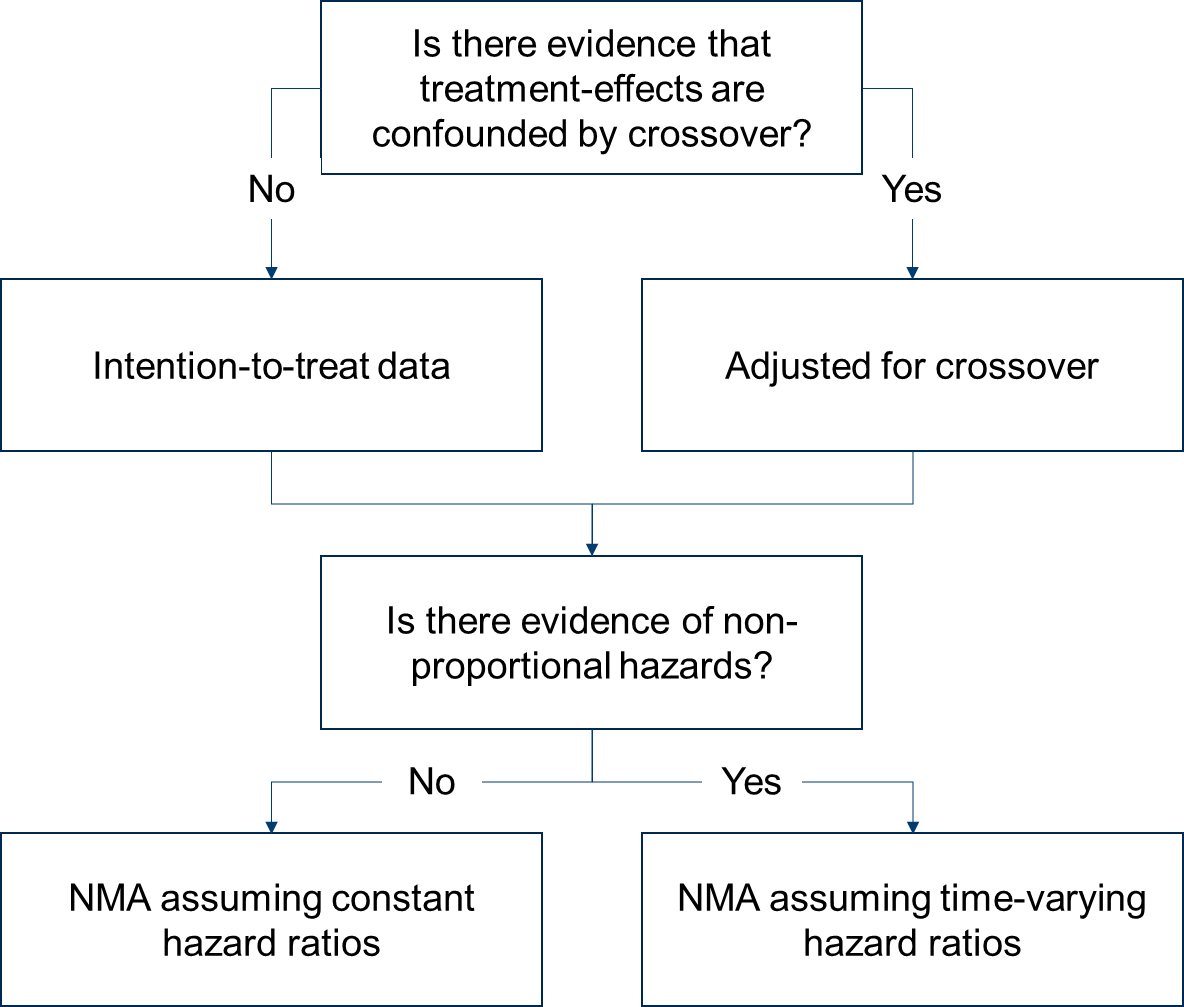


Abbreviations: NMA, network meta-analysis.
